# Supplementary material for: Automated Generation of Three-Dimensional Complex Muscle Geometries for Use in Personalised Musculoskeletal Models
Source: PubMed Central journal article supplement (PMC7280327; doi:10.1007/s10439-020-02490-4), 2020-03-17
Supplement: 10439_2020_2490_MOESM1_ESM.pdf [file 10439_2020_2490_MOESM1_ESM.pdf]

## Supplementary materials

### Appendix: Connecting the points of a muscle fibre to the moving bones

In traditional musculoskeletal models, each point of a muscle fibre is connected rigidly to a segment of the model, following the structure of a muscle representation atlas or the operator's design. In the presented high-resolution muscle representation, this would be unpractical, so an automated solution is necessary. The most straightforward approach for solving the fibre kinematics of the produced fibres is to bind the point to its nearest bone. Due to the complexity of the pelvic area, however, there might be a point whose nearest bone differs from the bone associated with its adjacent points, as illustrated in Figure A.1 (see points  $V_2$ ,  $V_3$ , and  $V_4$ ). This would result in a completely unrealistic geometrical path of the fibre. Even if no such point exists, the smoothness of the fibre could be severely impacted. For example, if  $V_3$  were associated with the femur, the fibre line-segments  $V_1$  to  $V_5$  would form a smooth curve but the rest ( $V_5$  to  $V_6$ ) would be just a long straight line-segment, likely to penetrate the bones in extreme poses scenarios. This justifies the implementation of the proposed fibre kinematic approach based on weight functions, as preserving the integrity of the muscle paths while also ensuring their smoothness.

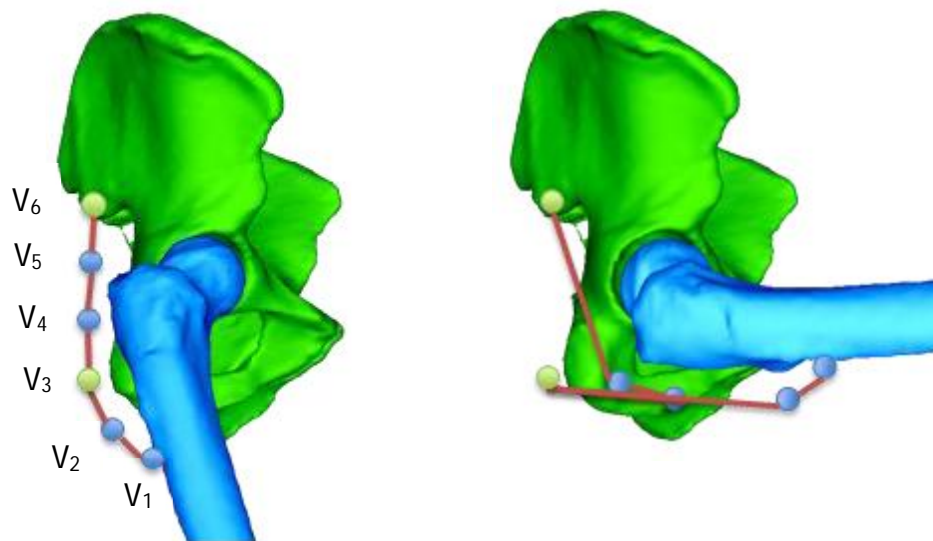

Figure A.1 Update of the fibre geometry using the common approach of musculoskeletal models that bind the via points, which the fibre passes through, to a single bone – in this case, automatically detected to be the nearest one.

It is possible to further justify also the choice of the weight function used in the fibre kinematics implementation. A popular choice<sup>1</sup> for setting the weights for skeletal animations in computer graphics is to set them proportional to the inverse Euclidean distance to the appropriate nearest bones using the formula:

$$w_{ij} = \left( \frac{\frac{1}{d_{ij}}}{\sum_{k=1}^2 \frac{1}{d_{ik}}} \right)^m \rightarrow w_{i1} = \left( \frac{d_{i2}}{d_{i1} + d_{i2}} \right)^m ; w_{i2} = \left( \frac{d_{i1}}{d_{i1} + d_{i2}} \right)^m$$

In this formula,  $d_{ij}$  denotes the Euclidean distance between point  $V_i$  and its  $j$ -th nearest bone and  $m$  is a parameter determining how quickly the effect of the more distant bone should diminish. Most typically, this parameter is set to 2.

In musculoskeletal models, bones are quite different from those in skeletal animations (where they are just line segments connecting the joints) and, therefore, inverse Euclidean distance weights produce undesirable results in the complex pelvic area, no matter what value of the parameter  $m$  is. For example, the fibre point  $V_2$  (see Figure A.1) would be strongly influenced by the pelvis segment even though it is very far from the muscle origin (on the pelvis) and much closer to the insertion (on the femur). The implemented function, on the other hand, uses a weighting function based on the relative distance between point  $V_i$  and the fibre origin  $V_1$  that avoids this issue:

$$t = \frac{i-1}{n-1}; \quad w_{i1} = a \cdot t^2 - (a+1) \cdot t + 1; \quad w_{i2} = 1 - w_{i1};$$

where  $n$  is the number of points in the muscle fibres and  $a$  is the muscle-specific parameter with the default value being 0.

## REFERENCES

1. Jacobson, A., Deng, Z., Kavan, L. Lewis, J.P. Skinning: real-time shape deformation. in ACM SIGGRAPH 2014 Courses. ACM. 2014.
